# Supplementary material for: Mixed Anhydride Intermediates in the Reaction of 5(4H)‐Oxazolones with Phosphate Esters and Nucleotides
Source: PubMed Central journal article supplement — Chemistry. 2016 Aug 18;22(42):14940–9. doi: 10.1002/chem.201602697 (PMC5074369; doi:10.1002/chem.201602697), 2016-08-18

# CHEMISTRY

## A **European** Journal

### Supporting Information

#### **Mixed Anhydride Intermediates in the Reaction of 5(4*H*)- Oxazolones with Phosphate Esters and Nucleotides**

Ziwei Liu,<sup>[a]</sup> Lukas Rigger,<sup>[b]</sup> Jean-Christophe Rossi,<sup>[a]</sup> John D. Sutherland,<sup>[b]</sup> and  
Robert Pascal<sup>\*[a]</sup>

chem\_201602697\_sm\_miscellaneous\_information.pdf

**Figure S1.** COSY  $^1\text{H}$ -NMR analysis of the products of the reaction of 25 mM 5(4*H*)-oxazolone **1** with 5 mM **3'-AMP** in  $\text{H}_2\text{O}$ .

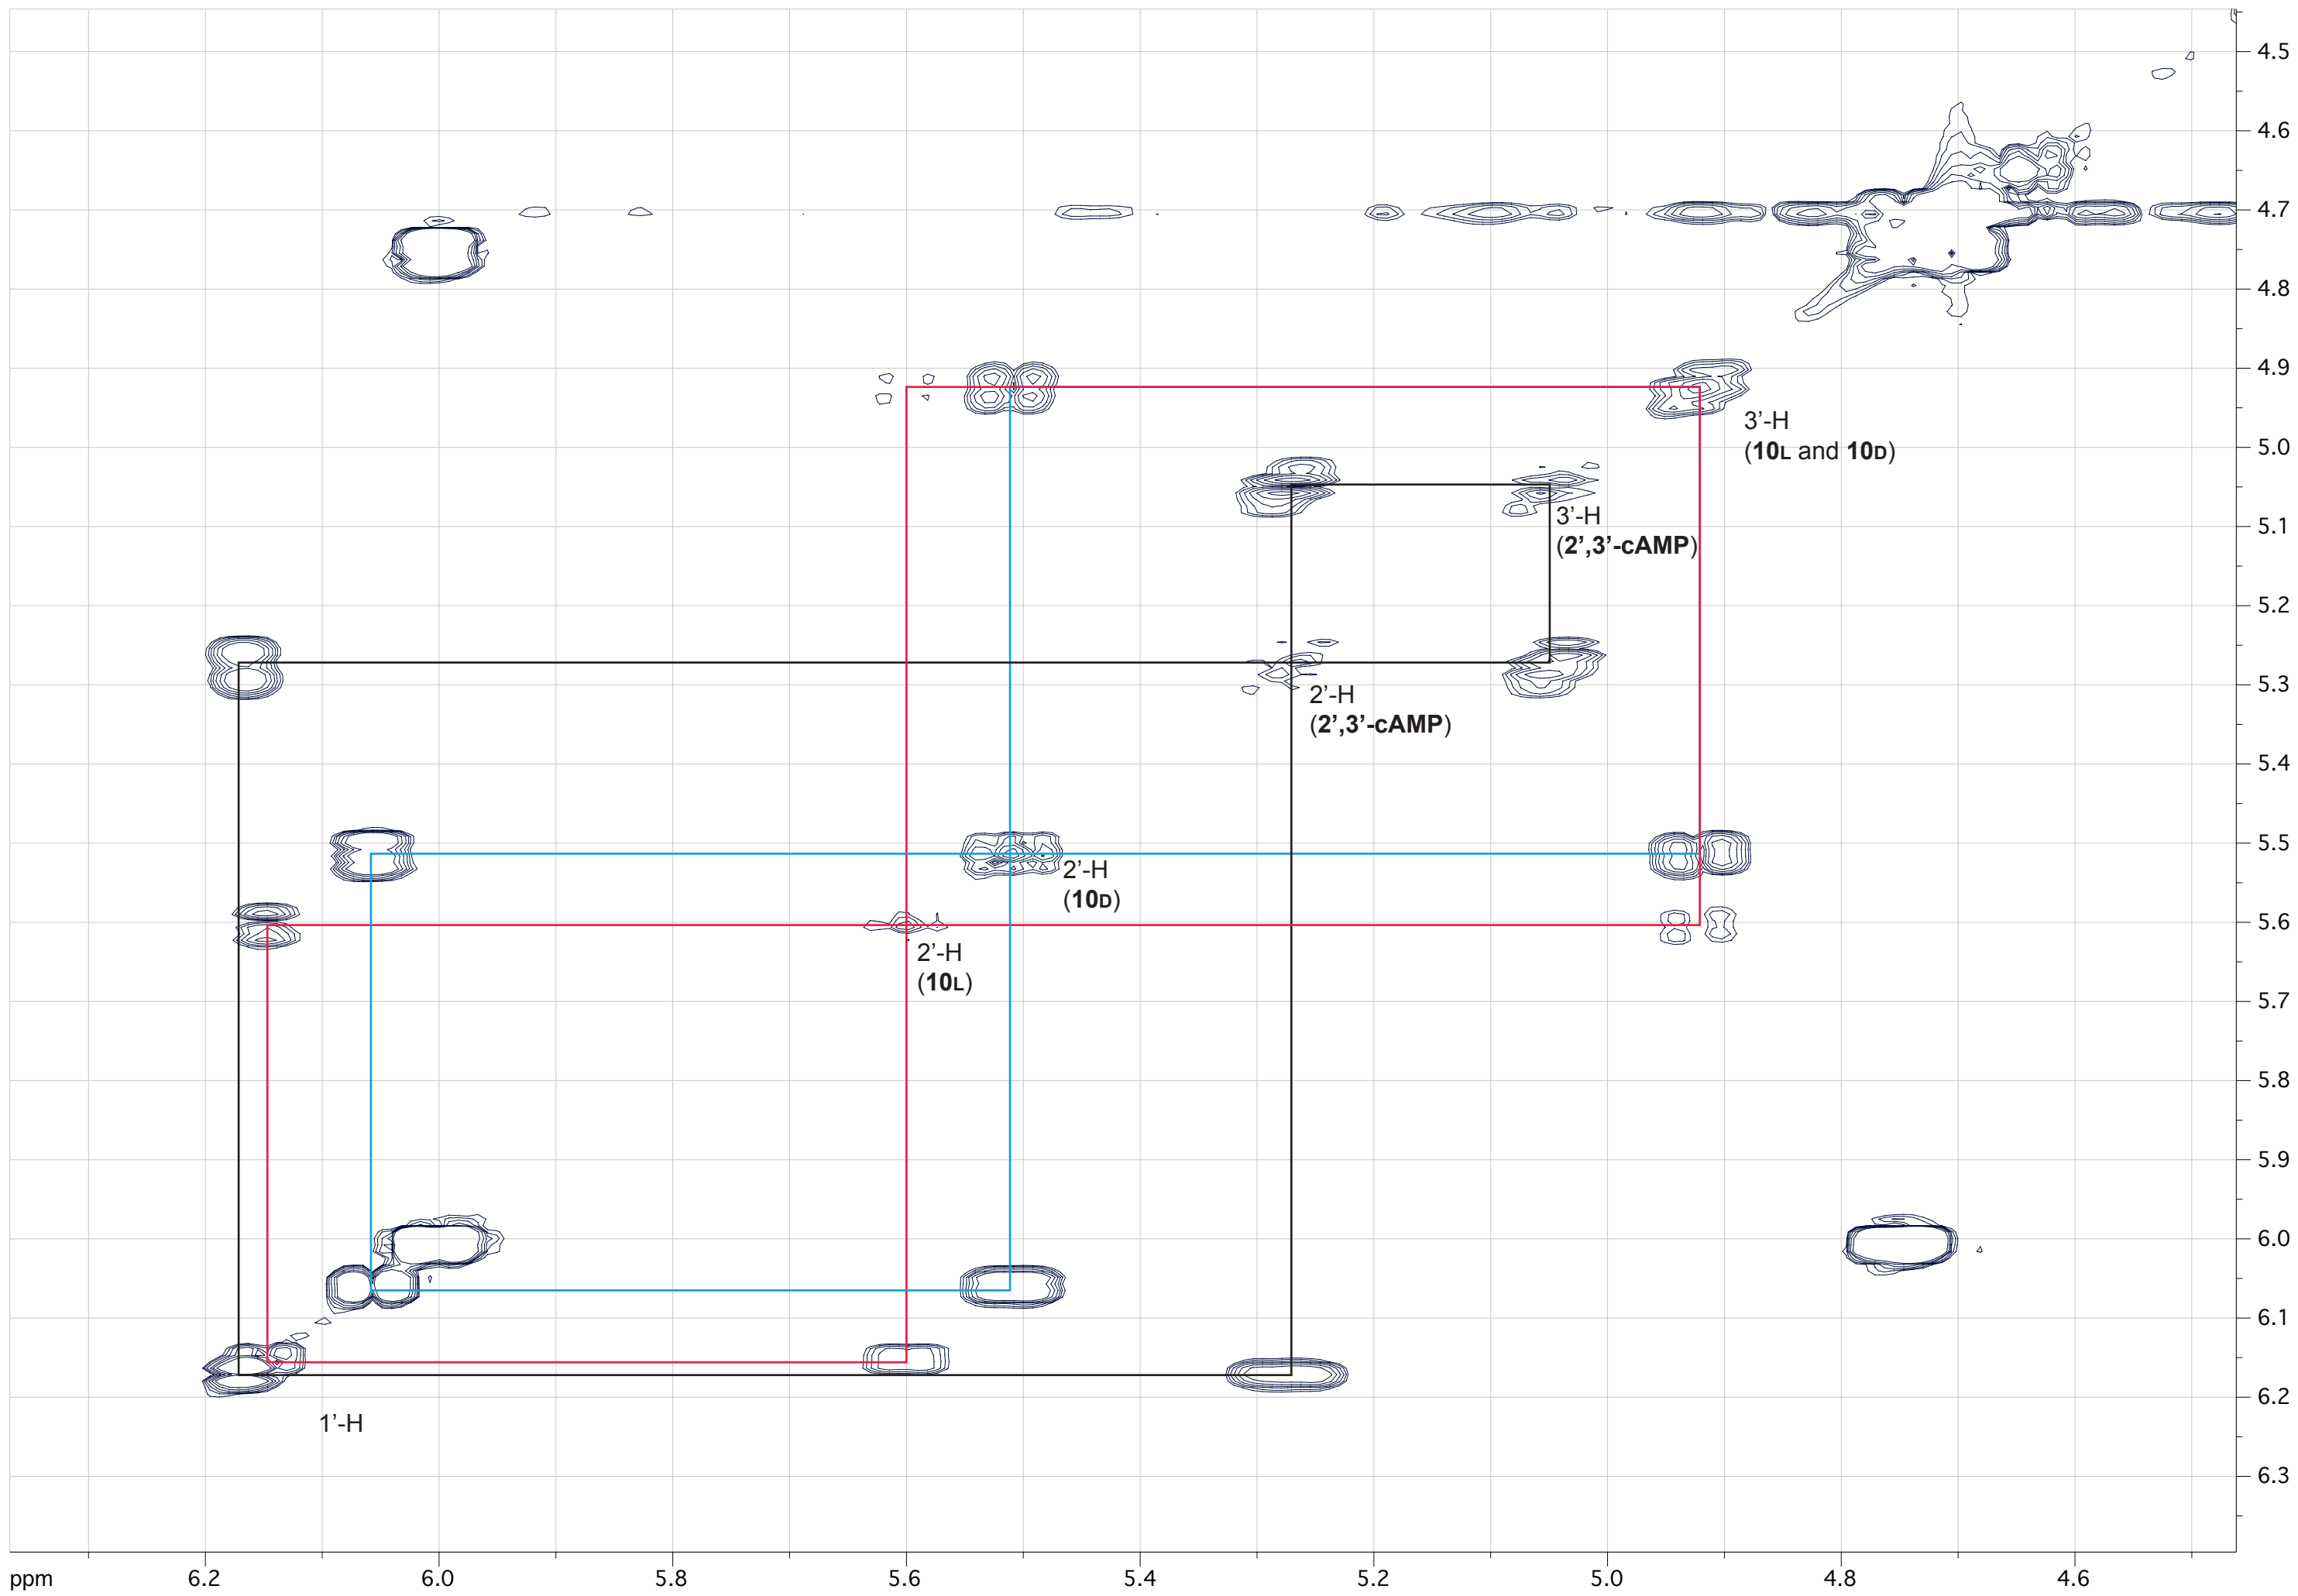

Supplement: NIHMS70193-supplement-Supp_Info.pdf [file NIHMS70193-supplement-Supp_Info.pdf]
